# Supplementary material for: An oxygen pool from YBaCo4O7-based oxides for soot combustion
Source: Royal Society of Chemistry journal article supplement (doi:10.1039/c5cy02181b), 2016-01-01
Supplement: c5cy02181b1.pdf [file c5cy02181b1.pdf]

## **An oxygen pool from YBaCo<sub>4</sub>O<sub>7</sub>-based oxides for soot combustion**

Guangkai Tian<sup>a</sup>, Hui Chen<sup>a</sup>, Chenxi Lu<sup>a</sup>, Ying Xin<sup>a</sup>, Qian Li<sup>a</sup>, James A. Anderson<sup>b</sup>,  
Zhaoliang Zhang<sup>a\*</sup>

<sup>a</sup> School of Chemistry and Chemical Engineering, Shandong Provincial Key  
Laboratory of Fluorine Chemistry and Chemical Materials, University of Jinan, No.  
336, West Road of Nan Xinzhuang, Jinan 250022, P. R. China

<sup>b</sup> Surface Chemistry and Catalysis Group, Department of Chemistry, University of  
Aberdeen, Aberdeen AB24 3UE, UK

### **7 pages (including this):**

- Table S1
- Figure S1–S4.

**Table S1** Textural properties

| Samples                                                                                      | Surface areas<br>(m <sup>2</sup> /g) | Pore volume<br>(cm <sup>3</sup> /g) | Average pore<br>size (nm) |
|----------------------------------------------------------------------------------------------|--------------------------------------|-------------------------------------|---------------------------|
| YBaCo <sub>4</sub> O <sub>7</sub>                                                            | 2.3                                  | 0.0056                              | 11.6                      |
| YBa(Co <sub>0.85</sub> Al <sub>0.075</sub> Ga <sub>0.075</sub> ) <sub>4</sub> O <sub>7</sub> | 4.1                                  | 0.0241                              | 56.4                      |

Figure S1

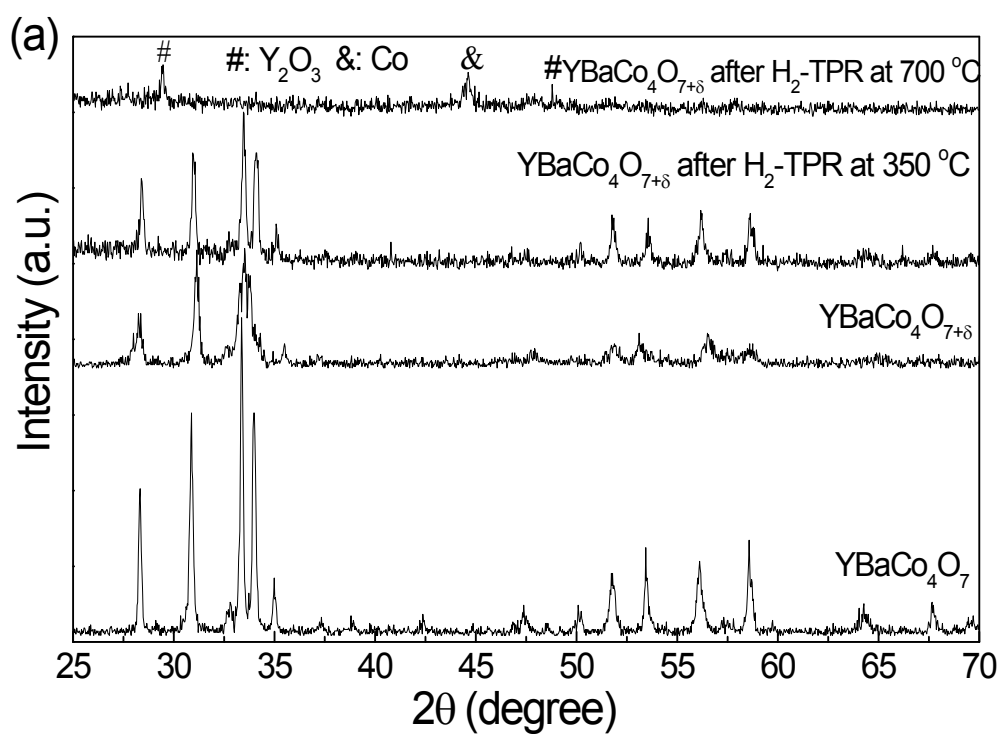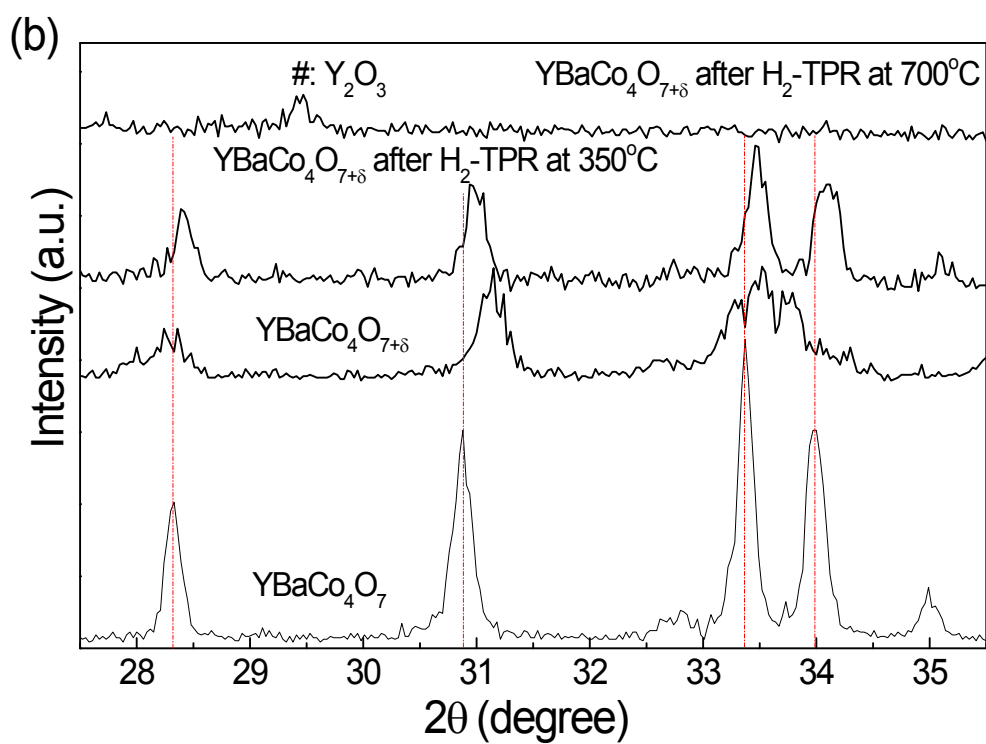

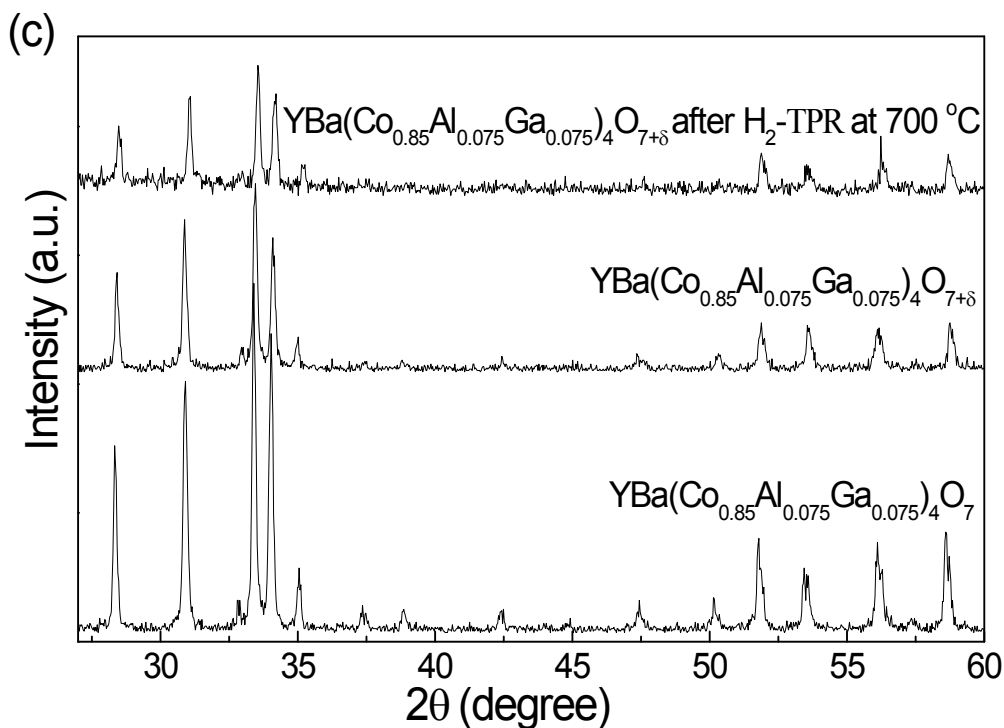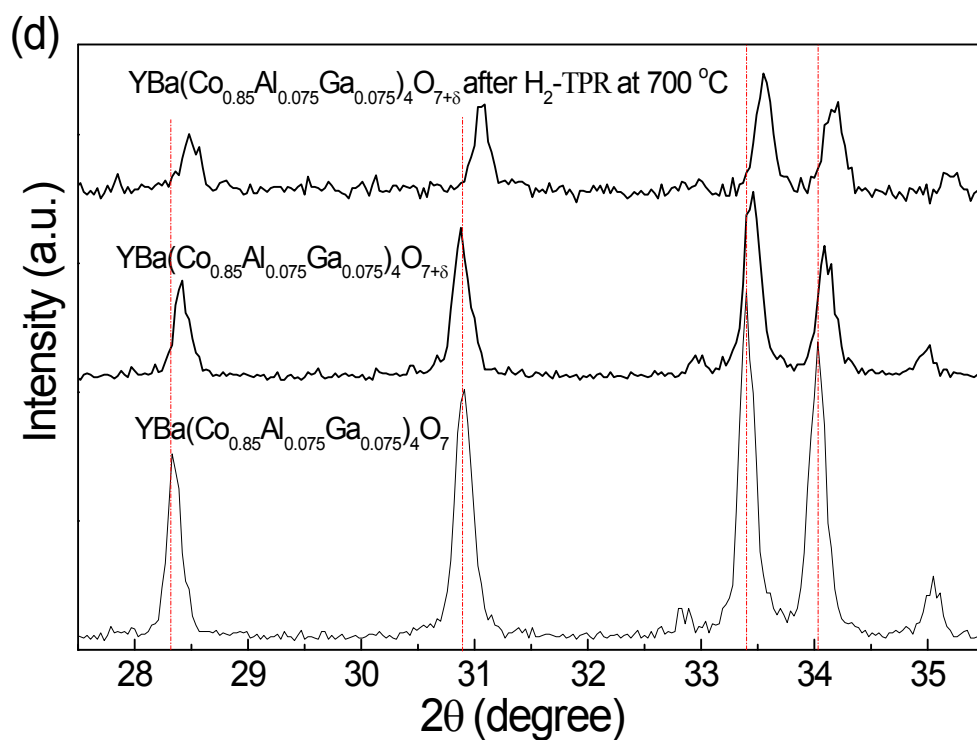

**Figure S1** XRD patterns (a and c) and enlarged XRD patterns (b and d) for YBaCo<sub>4</sub>O<sub>7+δ</sub> before and after H<sub>2</sub>-TPR finished at 350 and 700 °C (a and b) and for YBa(Co<sub>0.85</sub>Al<sub>0.075</sub>Ga<sub>0.075</sub>)<sub>4</sub>O<sub>7+δ</sub> (c and d) before and after H<sub>2</sub>-TPR finished at 700 °C.

Figure S2

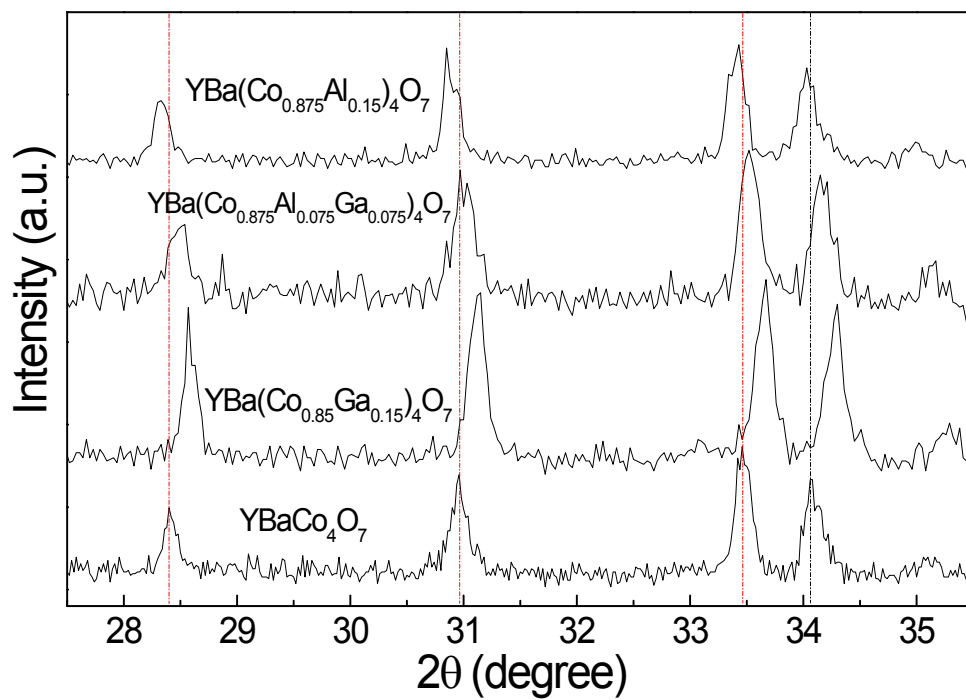

Figure S2 XRD patterns for  $\text{YBaCo}_4\text{O}_{7+\delta}$  before and after the substitution of Co by Al and/or Ga

**Figure S3**

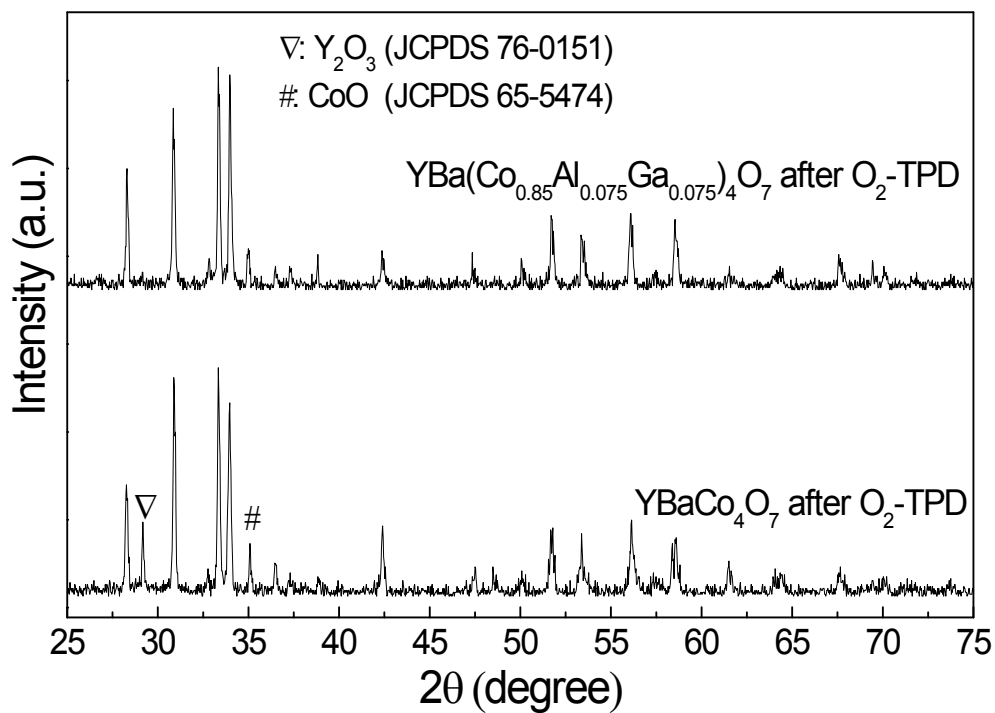

**Figure S3** XRD patterns for  $\text{YBaCo}_4\text{O}_{7+\delta}$  and  $\text{YBa}(\text{Co}_{0.85}\text{Al}_{0.075}\text{Ga}_{0.075})_4\text{O}_{7+\delta}$  after  $\text{O}_2$ -TPD at about 900 °C

Figure S4

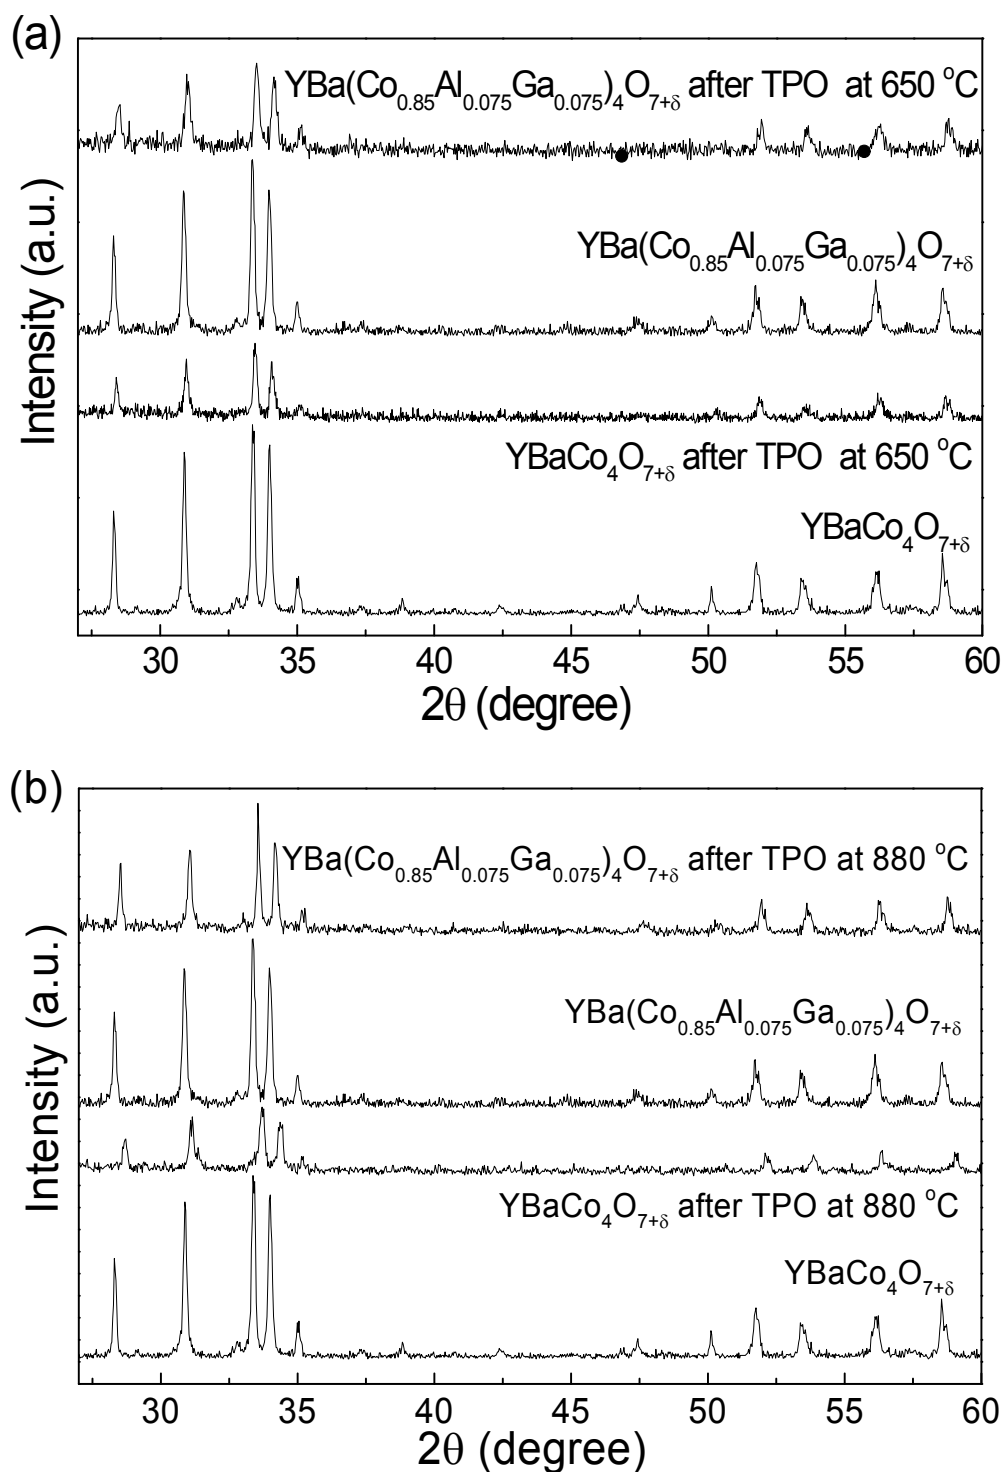

Figure S4 XRD patterns for  $\text{YBaCo}_4\text{O}_{7+\delta}$  and  $\text{YBa}(\text{Co}_{0.85}\text{Al}_{0.075}\text{Ga}_{0.075})_4\text{O}_{7+\delta}$  after TPO with  $\text{O}_2$  at about 650 °C (a) and 880 °C (b)
